# Supplementary material
Source: PubMed Central journal article supplement (PMC2762677)
Supplement: 0909055106_0909055106SI.pdf [file 0909055106_0909055106SI.pdf]

# Supporting Information

Mao et al. 10.1073/pnas.0909055106

Table S1. Fatty acid contents of total lipids extracted from the bone (femur and tibia) of 5-week-old male mice

| Fatty acid | Fatty acid composition, mol% |                |
|------------|------------------------------|----------------|
|            | WT                           | FACC1KO        |
| C14:0      | 3.17 ± 0.08                  | 3.57 ± 0.32    |
| C16:0      | 23.3 ± 0.15                  | 17.74 ± 0.7**  |
| C18:0      | 8.22 ± 0.13                  | 4.95 ± 0.56**  |
| C20:0      | 0.10 ± 0.01                  | 0.09 ± 0.00    |
| C22:0      | 0.16 ± 0.01                  | 0.09 ± 0.01**  |
| C24:0      | 0.26 ± 0.01                  | 0.14 ± 0.01**  |
| C16:1      | 5.30 ± 0.17                  | 7.94 ± 0.25**  |
| C18:1      | 22.06 ± 0.34                 | 28.34 ± 0.92** |
| C20:1      | 0.39 ± 0.02                  | 0.5 ± 0.01**   |
| C22:1      | 0.07 ± 0.04                  | 0.04 ± 0.02    |
| C24:1      | 0.38 ± 0.02                  | 0.23 ± 0.01**  |
| C18:2n-6   | 17.89 ± 0.05                 | 22.75 ± 1.2*   |
| C18:3n-6   | 0.42 ± 0.17                  | 0.31 ± 0.08    |
| C20:2n-6   | 0.81 ± 0.01                  | 0.81 ± 0.05    |
| C20:3n-6   | 0.85 ± 0.00                  | 0.63 ± 0.04**  |
| C20:4n-6   | 10.04 ± 0.2                  | 6.52 ± 0.43**  |
| C22:4n-6   | 1.66 ± 0.03                  | 1.12 ± 0.08**  |
| C22:5n-6   | 0.45 ± 0.03                  | 0.34 ± 0.03    |
| C18:3n-3   | 0.74 ± 0.02                  | 1.27 ± 0.09**  |
| C20:5n-3   | 0.12 ± 0.01                  | 0.10 ± 0.00    |
| C22:5n-3   | 0.82 ± 0.04                  | 0.62 ± 0.04*   |
| C22:6n-3   | 2.79 ± 0.15                  | 1.92 ± 0.2*    |

Each value represents the mean ± SEM ( $n = 3$ ). \*,  $P < 0.05$ ; \*\*,  $P < 0.01$ .
